# Supplementary material for: Global HCFC-22 measurements with MIPAS: retrieval, validation, global distribution and its evolution over 2005–2012
Source: Copernicus journal article supplement (doi:10.5194/acp-16-3345-2016), 2016-03-15
Supplement: Supplementary file 1 [file acp-16-3345-2016-supplement.zip]

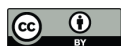

## *Supplement of*

# **Global HCFC-22 measurements with MIPAS: retrieval, validation, global distribution and its evolution over 2005–2012**

**M. Chirkov et al.**

*Correspondence to:* G. P. Stiller (gabriele.stiller@kit.edu)

- acp-16-3345-2016-supplement-title-page.pdf
- README\_Fig\_18.txt
- README\_Fig\_20.txt
- rel\_unexplained\_trend\_MIPAS-HATS\_AoA\_hcfc22+10-+20.dat
- rel\_unexplained\_trend\_MIPAS-HATS\_AoA\_hcfc22+20-+30.dat
- rel\_unexplained\_trend\_MIPAS-HATS\_AoA\_hcfc22+30-+40.dat
- rel\_unexplained\_trend\_MIPAS-HATS\_AoA\_hcfc22+40-+50.dat
- rel\_unexplained\_trend\_MIPAS-HATS\_AoA\_hcfc22+50-+60.dat
- rel\_unexplained\_trend\_MIPAS-HATS\_AoA\_hcfc22+60-+70.dat
- rel\_unexplained\_trend\_MIPAS-HATS\_AoA\_hcfc22+70-+80.dat
- rel\_unexplained\_trend\_MIPAS-HATS\_AoA\_hcfc22+80-+90.dat
- rel\_unexplained\_trend\_MIPAS-HATS\_AoA\_hcfc22-00-+10.dat
- rel\_unexplained\_trend\_MIPAS-HATS\_AoA\_hcfc22-10-00.dat
- rel\_unexplained\_trend\_MIPAS-HATS\_AoA\_hcfc22-20-10.dat
- rel\_unexplained\_trend\_MIPAS-HATS\_AoA\_hcfc22-30-20.dat
- rel\_unexplained\_trend\_MIPAS-HATS\_AoA\_hcfc22-40-30.dat
- rel\_unexplained\_trend\_MIPAS-HATS\_AoA\_hcfc22-50-40.dat
- rel\_unexplained\_trend\_MIPAS-HATS\_AoA\_hcfc22-60-50.dat
- rel\_unexplained\_trend\_MIPAS-HATS\_AoA\_hcfc22-70-60.dat
- rel\_unexplained\_trend\_MIPAS-HATS\_AoA\_hcfc22-80-70.dat

- rel\_unexplained\_trend\_MIPAS-HATS\_AoA\_hcfc22-90-80.dat
- trend\_hcfc22\_+10-+20.dat
- trend\_hcfc22\_+20-+30.dat
- trend\_hcfc22\_+30-+40.dat
- trend\_hcfc22\_+40-+50.dat
- trend\_hcfc22\_+50-+60.dat
- trend\_hcfc22\_+60-+70.dat
- trend\_hcfc22\_+70-+80.dat
- trend\_hcfc22\_+80-+90.dat
- trend\_hcfc22\_-00-+10.dat
- trend\_hcfc22\_-10-00.dat
- trend\_hcfc22\_-20-10.dat
- trend\_hcfc22\_-30-20.dat
- trend\_hcfc22\_-40-30.dat
- trend\_hcfc22\_-50-40.dat
- trend\_hcfc22\_-60-50.dat
- trend\_hcfc22\_-70-60.dat
- trend\_hcfc22\_-80-70.dat
- trend\_hcfc22\_-90-80.dat

The copyright of individual parts of the supplement might differ from the CC-BY 3.0 licence.
